# Short-Term, Efficient Sampling Strategies for Estimating Forest Moth Diversity Using Light Traps

KENICHI OZAKI,<sup>1,2</sup> KATSUHIKO SAYAMA,<sup>1</sup> AKIRA UEDA,<sup>1,3</sup> MASATO ITO,<sup>1</sup>  
KEN TABUCHI,<sup>1,4</sup> AND TERUHIKO HIRONAGA<sup>5,6</sup>

Ann. Entomol. Soc. Am. 104(4): 739–748 (2011); DOI: 10.1603/AN11030

**ABSTRACT** Evaluation of species diversity for highly diverse taxa is extremely time-consuming and costly; thus, there is a need to develop efficient sampling strategies. We established a short-term, efficient sampling scheme to produce samples that represent a full-season sampling of moth assemblages with a high degree of seasonality. We sampled adult moths monthly for the duration of the moth flying season by using light traps in five forest stands in a cool-temperate region in central Hokkaido, northern Japan. From this sample, we generated various subsamples that reduced the sampling period and the number of traps per stand, and tested whether these subsamples provide estimates of species richness, abundance, and species turnover representative of those revealed by the whole season sample. Comparisons between the whole season sample and each subsample indicated that setting one light trap on a night in July and August, which shortened the sampling period to 25% and reduced sample size to 38%, was the most efficient sampling scheme to estimate abundance, species richness, and similarity in the whole season sample. The comparisons also suggest that it is efficient to use rarified species richness as a species richness estimator, and the Bray–Curtis index or Morisita's  $C_\lambda$  for estimating species turnover between sites in moth assemblages.

**KEY WORDS** biodiversity, Lepidoptera, seasonality, species richness estimator, species turnover

Pervasive habitat loss and associated species extinction have emphasized the urgent need to evaluate species diversity. However, evaluating species diversity for highly diverse taxa, such as insects, is extremely time-consuming and costly because there are so many species in one area (Lawton et al. 1998). Given the limitations in resources available for intensive, long-term surveys, there is a need to develop efficient sampling methods for evaluating biodiversity (Ozaki et al. 2006).

Efficient sampling methods should reduce time and cost needed for sampling without causing significant information loss in species richness (number of species) at sites ( $\alpha$  diversity) and species turnover (dissimilarity of species composition) between sites ( $\beta$  diversity) (Jones and Eggleton 2000). Several species richness estimators (Colwell and Coddington 1994) and similarity indices (Chao et al. 2005) that substantially reduce undersampling bias have been developed to estimate species richness and turnover. These estimators and indices might provide tools to achieve

reliable estimates of species richness and turnover from sampling schemes with reduced sample size (Brose 2002). Efficient sampling schemes should also consider patterns of seasonality because limitations in resources do not usually allow full-season sampling (Oliver and Beattie 1996).

Insects are one of the most hyperdiverse and critical components of terrestrial ecosystems (Odegaard 2000). Lepidoptera (mostly moths) is among the most speciose groups of insects and has important ecosystem functions as herbivores, detritivores, and pollinators (Schowalter et al. 1986, Summerville and Crist 2008). In addition to this impressive diversity, moths are easily collected with light traps that are widely recognized as the standard tool for sampling night-flying moths (Southwood and Henderson 2000). Although trap catches are influenced by weather, moon phase, and trap design (Yela and Holyoak 1997, Butler et al. 1999, Intachat and Woiwod 1999), light traps are useful tools to quantify moth communities if used with care (Kitching et al. 2000, Raimondo et al. 2004).

One constraint with using light traps is the processing cost associated with sorting and identifying individuals in the sample because light traps capture a huge number of moths (Thomas and Thomas 1994). Two studies examined optimal sampling hours within a night that reduced the catch without causing loss of information on moth communities (Thomas and Thomas 1994, Scalercio et al. 2009). However, few studies have examined the effect of sampling intensity

<sup>1</sup> Hokkaido Research Center, Forestry and Forest Products Research Institute, Hitsujigaoka, Sapporo 062-8516, Japan.

<sup>2</sup> Corresponding author, e-mail: ozaki@affrc.go.jp.

<sup>3</sup> Current address: Kyushu Research Center, Forestry and Forest Products Research Institute, Kurokami, Kumamoto 860-0862, Japan.

<sup>4</sup> Current address: National Agricultural Research Center for Tohoku Region, Morioka 020-0198, Japan.

<sup>5</sup> The Hokkaido University Museum, Sapporo 060-0810, Japan.

<sup>6</sup> Current address: Regional Environmental Planning Inc., Kyusyu branch, Fukuoka 814-0006, Japan.

(number of traps per site) on the quality of data collected. In temperate forests, the sampling period within a year is also important to develop efficient sampling schemes because seasonality has a pronounced effect on moth assemblages in temperate regions (Summerville and Crist 2005, Hirao et al. 2006). Landau et al. (1999) compared a long-term collection for a period of eight months to an intensive, short-term collection for a period of one month and found a similarity (76% species overlap) in moth catch. However, the number of moths trapped did not reduce in the short-term collection because of the greater number of traps and shorter sampling interval, which resulted in the similar number of trap nights in the two collection schemes. Therefore, short-term sampling schemes that reduce both sampling period and sampling intensity are needed.

The aim of the current study was to find a short-term, efficient sampling scheme to collect samples that are representative of the full-season sampling of moth assemblages with a high degree of seasonality. We collected adult moths using light traps during the whole moth flying season in forest stands in a cool-temperate region. In this sample, seasonal changes in the numbers of species and individuals were unimodal with a peak in summer (July or August) and species composition changed greatly between successive months due to the short occurrence period of each species (Sayama et al. 2011). From this sample, we generated various subsamples that reduced the sampling period and sampling intensity, and tested whether these subsamples provided estimates of species richness, abundance, and species turnover representative of those revealed by the whole season sample.

## Materials and Methods

**Study Sites and Moth Sampling.** Moth sampling was conducted in five forest stands in Sapporo, central Hokkaido, northern Japan (42° 53'–43° 00' N, 141° 22'–26' E; 150–400 m above sea level). We selected two stands in deciduous broadleaved forests, two stands in Japanese larch (*Larix kaempferi* Carriere) plantations (42 and 47 yr old), and one stand in a Sachalin fir (*Abies sachalinensis* Masters) plantation (48 yr old). We chose these forest types because they are the most common forest types in the region. Study stands were always >10 ha and located >1 km apart. Stands in broadleaved forests are dominated by mizunara oak (*Quercus crispula* Blume), linden (*Tilia japonica* Simonkai), painted maple (*Acer pictum* Thunb.), and cucumber tree (*Magnolia obovata* Thunb.). The conifer plantations have some naturally regenerated trees that include mizunara oak, linden, and Japanese elm (*Ulmus davidiana* variety *japonica* Nakai). Mean tree height in each stand ranges from 17 to 20 m. Forest understories are covered by dwarf bamboo [*Sasa kurilensis* (Rupr.) Makino et Shibata].

We collected moths using portable light traps developed by Okochi (2002). This trap consists of a rectangular cage (90 by 90 by 150 cm high) produced

with half transparent white nylon netting and is equipped with a 6-W blacklight fluorescent tube powered by a 9-V alkaline dry battery. The cage has a horizontal slit (20 cm) on four sides through which moths may enter the cage to become trapped in the lower part, which has a funnel-type lid at the top to prevent moths from escaping.

We operated light traps on a night around the new moon in each month throughout the entire moth flying season, April–November, in 2005. Light traps also were operated in December, but no moths were caught. Trapping was not carried out on rainy or windy nights because these conditions can negatively affect light trap catches (Mizutani 1984, Choi 2008). On each sampling night, we set two light traps at a height of  $\approx 1.5$  m at fixed locations that were 100 m apart in the center of each stand. Therefore, 80 trap nights (five stands  $\times$  8 mo  $\times$  two traps) were accumulated in total. Traps remained lit throughout the nights, and early the next morning, captured moths were killed with ethyl acetate, and were frozen until identification. We identified 67–85% of sampling individuals per stand to species. Unidentified individuals were those with extensive wing wear or from microlepidopteran moths (e.g., Tortricidae). Voucher specimens from this study were deposited at Hokkaido Research Center, Forestry and Forest Products Research Institute.

**Data Analyses.** All sampling periods and traps in each stand were combined to yield a whole season sample. Then we split the whole season sample in several subsamples based on the following reduced sampling schemes. At first, we generated monthly subsamples from July to September to reduce sampling period. We used these months so that each subsample contained >5% of individuals in the whole season sample. However, none of the monthly subsamples were able to estimate species richness in the whole season sample, although the monthly subsample in August provided adequate estimates of abundance and similarity (data not shown). Therefore, we generated 2-month subsamples from every combination of 2 months from June to September, giving six combinations. Then for each 2-month subsample, we reduced sampling intensity by generating one-trap subsamples by randomly assigning two traps in each stand to two groups.

We calculated abundance and the following species richness estimators and similarity indices from the whole season sample and its subsamples. Abundance also was used to assess the processing cost for sorting and identifying moths in each sampling scheme. For species richness, we calculated observed species richness ( $S_{obs}$ ), a rarefied species richness, and four non-parametric species richness estimators. Rarefied species richness is the expected number of species in a random sample of a given number of individuals using rarefaction (Hurlbert 1971). Rarefaction standardizes sample size to a common abundance level so that direct comparisons among samples can be made (Magurran 2004). A sample size of 100 individuals ( $S_{100}$ ) was chosen as the lowest number of individuals

**Table 1.** Mean (SD) of abundance, species richness estimators, and similarity indices in each stand obtained from the whole season sample and its 2-mo subsamples

| Sampling period            | Whole season     | June + July      | June + Aug.      | June + Sept.    | July + Aug.      | July + Sept.     | Aug. + Sept.     |
|----------------------------|------------------|------------------|------------------|-----------------|------------------|------------------|------------------|
| Abundance                  | 2918.20 (847.99) | 1173.60 (610.77) | 1289.80 (294.10) | 475.20 (202.52) | 2242.60 (861.36) | 1428.00 (564.36) | 1544.20 (321.08) |
| Species richness estimator |                  |                  |                  |                 |                  |                  |                  |
| $S_{obs}$                  | 347.80 (13.08)   | 165.20 (23.06)   | 189.60 (10.54)   | 101.00 (11.52)  | 254.60 (15.51)   | 194.20 (18.64)   | 203.00 (8.46)    |
| $S_{100}$                  | 62.44 (4.17)     | 51.21 (6.70)     | 52.39 (4.42)     | 45.31 (4.16)    | 57.95 (4.44)     | 52.03 (6.77)     | 51.83 (2.99)     |
| Chao1                      | 494.58 (35.28)   | 242.86 (36.70)   | 285.00 (38.34)   | 182.70 (39.06)  | 354.70 (15.48)   | 297.66 (34.94)   | 288.12 (35.84)   |
| ACE                        | 511.84 (78.69)   | 266.10 (63.59)   | 294.70 (64.23)   | 209.28 (50.71)  | 380.00 (57.49)   | 332.36 (47.01)   | 301.70 (56.94)   |
| Jack1                      | 470.36 (13.43)   | 228.32 (31.78)   | 263.74 (18.40)   | 149.70 (16.60)  | 340.56 (11.36)   | 270.94 (23.97)   | 277.96 (18.22)   |
| Jack2                      | 541.72 (25.72)   | 266.46 (38.15)   | 308.88 (28.66)   | 183.34 (23.59)  | 389.72 (12.55)   | 318.88 (28.42)   | 319.90 (30.24)   |
| Similarity index           |                  |                  |                  |                 |                  |                  |                  |
| Bray–Curtis                | 0.39 (0.08)      | 0.32 (0.10)      | 0.40 (0.10)      | 0.33 (0.09)     | 0.38 (0.09)      | 0.32 (0.10)      | 0.40 (0.09)      |
| Adjusted                   | 0.87 (0.07)      | 0.80 (0.14)      | 0.85 (0.06)      | 0.86 (0.06)     | 0.85 (0.07)      | 0.83 (0.11)      | 0.88 (0.06)      |
| Sorensen                   |                  |                  |                  |                 |                  |                  |                  |
| Morisita's $C_A$           | 0.33 (0.14)      | 0.31 (0.20)      | 0.45 (0.15)      | 0.42 (0.24)     | 0.35 (0.15)      | 0.25 (0.17)      | 0.43 (0.15)      |

caught in each stand across the subsamples. Rarefied species richness represents the ranking of true species richness only when rarefaction curves do not intersect (Lande et al. 2000). So, we constructed sample-based rarefaction curves without replacement using trap nights as sampling units for the whole season sample and examined whether rarefaction curves for different stands intersected. These rarefaction curves were generated with Estimate S version 8.20 (Colwell 2005). We also calculated four nonparametric species richness estimators (Chao1, abundance-based coverage estimator [ACE], first-order Jackknife and second-order Jackknife) because these were the most accurate abundance-based estimators for species with high movement heterogeneity (Brose and Martinez 2004). According to Chao and Shen (2003), we used a bias-corrected estimator for Chao1. We also set a cut off point = 10 in ACE and used ACE-1 instead of ACE when estimated coefficient of variation for rare species exceeded 0.8. Then, we examined performance of the nonparametric estimators with increasing sample size for the whole season sample (Colwell and Codrington 1994).

The following three similarity indices were calculated for each pair of five stands. First, we calculated the Bray-Curtis index because this is the widely used and particularly suitable index for abundance data (Magurran 2004). However, this index is also known to underestimate true similarity with small sample sizes especially when assemblages contain many rare species (Chao et al. 2005). Thus, we calculated the abundance-based Sorensen index adjusted for unseen shared species (adjusted Sorensen index) introduced by Chao et al. (2005) to reduce the undersampling bias. We also calculated Morisita's original index ( $C_A$ ) (Morisita 1959), known to be independent of sample size. The nonparametric species richness estimators and adjusted Sorensen index were calculated with SPADE (Chao and Shen 2003).

To evaluate each reduced sampling scheme, we plotted values of abundance, species richness estimators and similarity indices in each stand obtained from each subsample on those obtained from the whole season sample (Brose 2002). All data points fall on the diagonal line if the subsample generates unbiased estimates. However, even if points are not on the diagonal line, the subsample can estimate relative differ-

ence between stands if values produced by the subsample are highly correlated with values produced by the whole season sample. This relationship was assessed using  $r^2$  value of the linear regression (Brose et al. 2003). We also examined the scatterplot to check whether the high  $r^2$  was caused by outliers.

**Larval Feeding Plants and Voltinism.** We grouped moth species according to their larval feeding plants or voltinism to examine whether these life history traits affected the performance of the most efficient sampling scheme. For the larval feeding plants, we assigned moth species to those that feed on woody plants or the others (e.g., forb, graminoid, lichen and moss). We used this coarse classification because further classification reduced the sample size in each group to <100, the lowest number for calculating  $S_{100}$ . The feeding guild classification was based on the information of larval feeding plants in published literature (Inoue et al. 1982, Miyata 1983, Sugi et al. 1987). For voltinism, Sayama et al. (2011) classified moth species in the present data into univoltine (227 species), multivoltine (21 species), and unknown (445 species in which <10 individuals were collected). Among these groups, we used only univoltine species because of the small sample size (<100) in the other groups. Then for each group, we calculated  $r^2$  of the linear regressions of values in the most efficient subsample on those in the whole season sample.

**Table 2.**  $r^2$  values obtained from the linear regressions of values of each measure in 2-mo subsamples on those in the whole season sample

| Sampling period            | June + July | June + Aug. | June + Sept. | July + Aug. | July + Sept. | Aug. + Sept. |
|----------------------------|-------------|-------------|--------------|-------------|--------------|--------------|
| Abundance                  | 0.86        | 0.81        | 0.00         | 0.90        | 0.96         | 0.61         |
| Species richness estimator |             |             |              |             |              |              |
| $S_{obs}$                  | 0.42        | 0.05        | 0.00         | 0.40        | 0.53         | 0.01         |
| $S_{100}$                  | 0.69        | 0.18        | 0.06         | 0.96        | 0.52         | 0.14         |
| Chao1                      | 0.06        | 0.76        | 0.38         | 0.85        | 0.00         | 0.65         |
| ACE                        | 0.03        | 0.95        | 0.48         | 0.73        | 0.00         | 0.94         |
| Jack1                      | 0.00        | 0.15        | 0.57         | 0.00        | 0.00         | 0.16         |
| Jack2                      | 0.07        | 0.54        | 0.70         | 0.35        | 0.02         | 0.49         |
| Similarity index           |             |             |              |             |              |              |
| Bray–Curtis                | 0.80        | 0.81        | 0.67         | 0.97        | 0.83         | 0.85         |
| Adjusted                   | 0.66        | 0.20        | 0.14         | 0.83        | 0.92         | 0.47         |
| Sorensen                   |             |             |              |             |              |              |
| Morisita's $C_A$           | 0.77        | 0.18        | 0.26         | 0.96        | 0.87         | 0.27         |

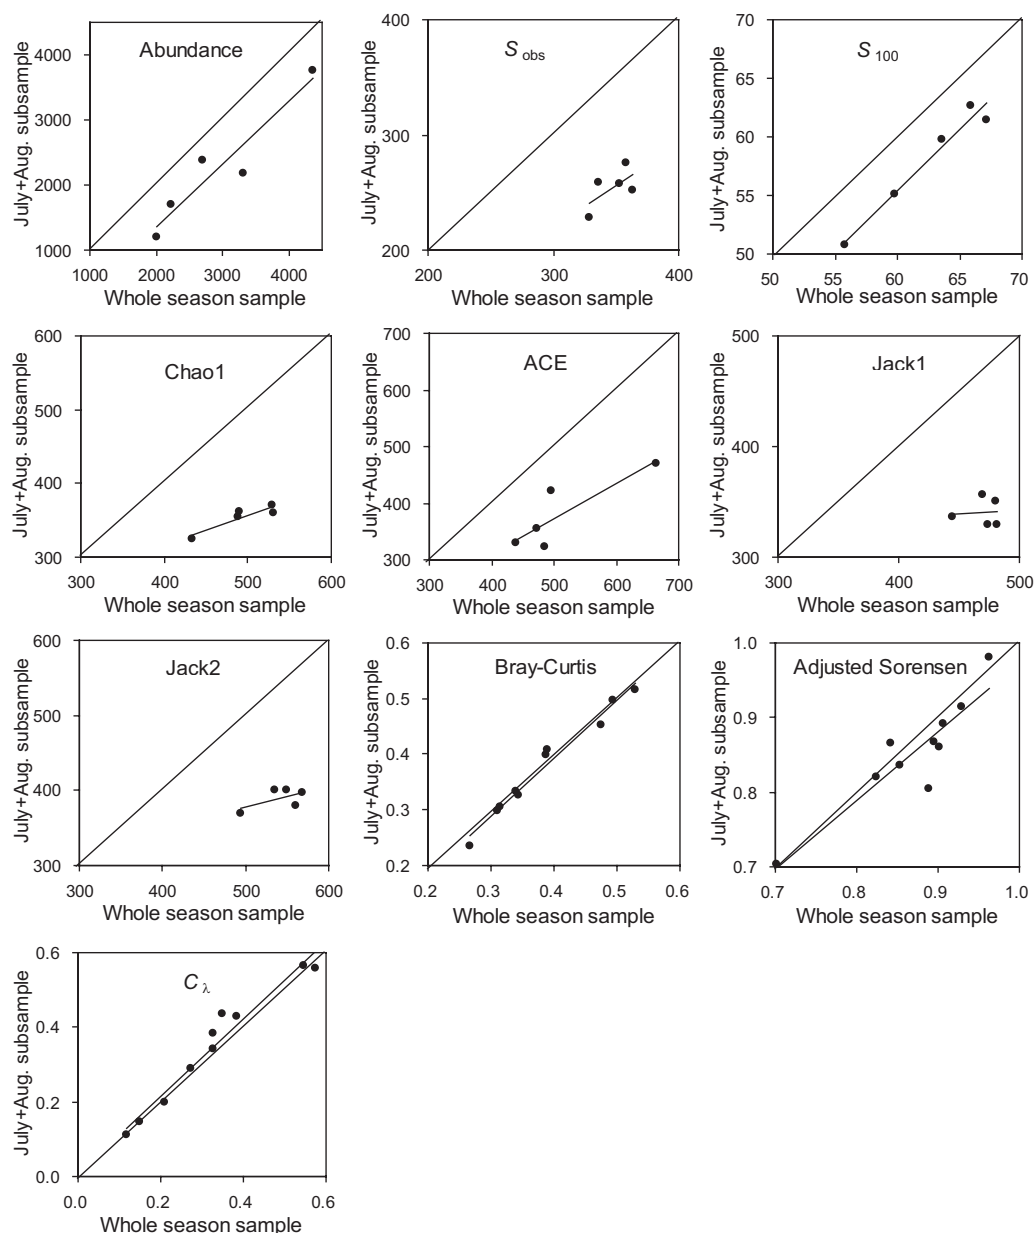

Fig. 1. Relationships between values of each measure in 2-mo subsample in July + August and those in the whole season sample.

## Results

**Two-Month Subsamples.** In total, 14,591 adult moths, consisting of 693 species in 29 families, were collected and identified in the five study stands. Of the total abundance, 36 and 40% were collected in July and August, respectively. Abundance in 2-mo subsamples were highest in July + August (76% of the total abundance) and lowest in June + September (16%) (Table 1). Abundance in June + July, June + August, July + August, and July + September were highly correlated ( $r^2 > 0.8$ ) with that in the whole season (Table 2). The

relationship between abundance in July + August and that in the whole season showed that although points were not on the diagonal line, the July + August subsample can estimate relative difference between stands in the whole season sample (Fig. 1).

For species richness estimators, all 2-mo subsamples underestimated the values in the whole season sample (Table 1). ACE had  $r^2 > 0.7$  in June + August, July + August, and August + September subsamples (Table 2), but these high  $r^2$  values were caused by an outlier exemplified in Fig. 1 in the July + August subsample.



**Table 3.**  $r^2$  values obtained from the linear regressions of values of each measure in one-trap subsamples on those in the whole season sample

| Sampling period            | June + July | June + Aug. | June + Sept. | July + Aug. | July + Sept. | Aug. + Sept. |
|----------------------------|-------------|-------------|--------------|-------------|--------------|--------------|
| Abundance                  | 0.84        | 0.70        | 0.00         | 0.86        | 0.86         | 0.51         |
| Species richness estimator |             |             |              |             |              |              |
| $S_{obs}$                  | 0.33        | 0.36        | 0.20         | 0.44        | 0.46         | 0.39         |
| $S_{100}$                  | 0.64        | 0.13        | 0.44         | 0.81        | 0.49         | 0.08         |
| Chao1                      | 0.31        | 0.48        | 0.08         | 0.20        | 0.10         | 0.63         |
| ACE                        | 0.37        | 0.55        | 0.40         | 0.39        | 0.04         | 0.92         |
| Jack1                      | 0.09        | 0.08        | 0.27         | 0.05        | 0.06         | 0.21         |
| Jack2                      | 0.28        | 0.19        | 0.31         | 0.18        | 0.10         | 0.39         |
| Similarity index           |             |             |              |             |              |              |
| Bray–Curtis                | 0.74        | 0.73        | 0.55         | 0.93        | 0.82         | 0.38         |
| Adjusted                   | 0.76        | 0.07        | 0.27         | 0.44        | 0.63         | 0.12         |
| Sorensen                   |             |             |              |             |              |              |
| Morisita's $C_\lambda$     | 0.72        | 0.12        | 0.19         | 0.86        | 0.70         | 0.15         |

Two light traps in each stand were randomly assigned into two groups, and mean  $r^2$  values of the two groups are shown.

Other than ACE,  $S_{100}$  and Chao1 had  $r^2 > 0.8$  in the July + August subsample (Table 2). Figure 1 showed that the July + August subsample can estimate relative difference in  $S_{100}$  and Chao1 between stands in the whole season sample.

Values of similarity indices did not differ largely between 2-mo subsamples and the whole season sample (Table 1). Similarity indices had high  $r^2$  values in most of the 2-mo subsamples (Table 2). Especially, the Bray–Curtis index had the highest  $r^2$  among the three similarity indices except for in the July + September subsample. Among the subsamples, the Bray–Curtis index and  $C_\lambda$  had the largest  $r^2$  in July + August subsample. The relationship between values of similarity indices in July + August and those in the whole season showed that points were close to the diagonal line (Fig. 1), indicating that all similarity indices in the July + August subsample produced unbiased estimates of the whole season sample. These results from 2-mo subsamples indicate that July + August is the optimal two-month sampling period to estimate abundance, species richness and similarity in the whole season sample. However, this sampling scheme only reduced the abundance to 24%, and >2,000 moths on average were captured in each stand (Table 1). Therefore, we generated one-trap subsamples to reduce sampling intensity.

**One-Trap Subsamples.** Although abundance was reduced to half of the 2-mo subsamples,  $r^2$  of abundance were still >0.7 in June + July, June + August, July + August, and July + September subsamples (Table 3). The relationship between abundance in July + August and that in the whole season showed that the one-trap subsample in July + August can estimate relative difference between stands in the whole season sample (Fig. 2).

For species richness estimators, values of  $S_{obs}$  and nonparametric estimators decreased greatly, whereas values of  $S_{100}$  decreased only slightly when the number of traps in each stand was reduced from two to one (Tables 1 and 4). ACE in August + September had the highest  $r^2$  among the species richness estimators (Table 3), but this high  $r^2$  was due to an outlier. Other than

ACE,  $S_{100}$  in July + August had  $r^2 > 0.8$  and the relationship between  $S_{100}$  in this subsample and that in the whole season sample shows that the July + August subsample can estimate relative difference between stands in the whole season sample (Fig. 2). Because  $r^2$  of species richness estimators were <0.65 in the other subsamples,  $S_{100}$  in July + August was the only estimator that adequately estimated species richness in the whole season.

Values of similarity indices decreased only slightly when the number of traps in each stand was reduced from two to one (Tables 1 and 4). Although the Bray–Curtis index and  $C_\lambda$  still had high  $r^2$  in most of the one-trap subsamples,  $r^2$  of adjusted Sorensen decreased substantially (Tables 2 and 3). Among the subsamples, the Bray–Curtis index and  $C_\lambda$  had the largest  $r^2$  in the July + August subsample. The relationship between values of similarity indices in the July + August subsample and those in the whole season sample shows that  $C_\lambda$  produced almost unbiased estimates of the whole season sample, but values of the Bray–Curtis index were slightly underestimated (Fig. 2). In summary, when we reduced the number of traps in each stand from two to one, we found that the July + August subsample, which shortened the sampling period to 25% and reduced sample size to 38%, can estimate abundance, species richness, and similarity in the whole season sample.

When we grouped moth species according to their larval feeding plants or voltinism, the one-trap subsample in July + August can estimate abundance, species richness and similarity in the whole season sample in most of the groups (Table 5):  $r^2$  of abundance and  $S_{100}$  were >0.7 except for woody plant feeders, whereas the Bray–Curtis index and  $C_\lambda$  had  $r^2 > 0.8$  for all the groups.

**Rarefaction.** Sample-based rarefaction curves for the whole season sample showed that although species richness increased steadily with the accumulated number of individuals, rarefaction curves in five stands did not intersect each other across the range of our sampling efforts (Fig. 3). Furthermore, values of the four nonparametric estimators changed with the accumulated number of individuals and did not reach stable asymptotes in any of the five stands (Fig. 4).

### Discussion

**Efficient Sampling Scheme.** Seasonality is by far the most important variable affecting community composition of forest Lepidoptera in temperate regions (Summerville and Crist 2003, Sayama et al. 2011). The current study clearly reveals that even in the moth assemblages with high seasonality, short-term sampling can provide values of abundance, species richness, and turnover representative of the whole season sampling if we choose the appropriate sampling periods and diversity indices. In particular, sampling both in July and August was the optimal period for estimating abundance, species richness, and similarity. This is consistent with the previous findings that choosing the peak season of moth emergence maximizes sampling efficiency (Sparrow

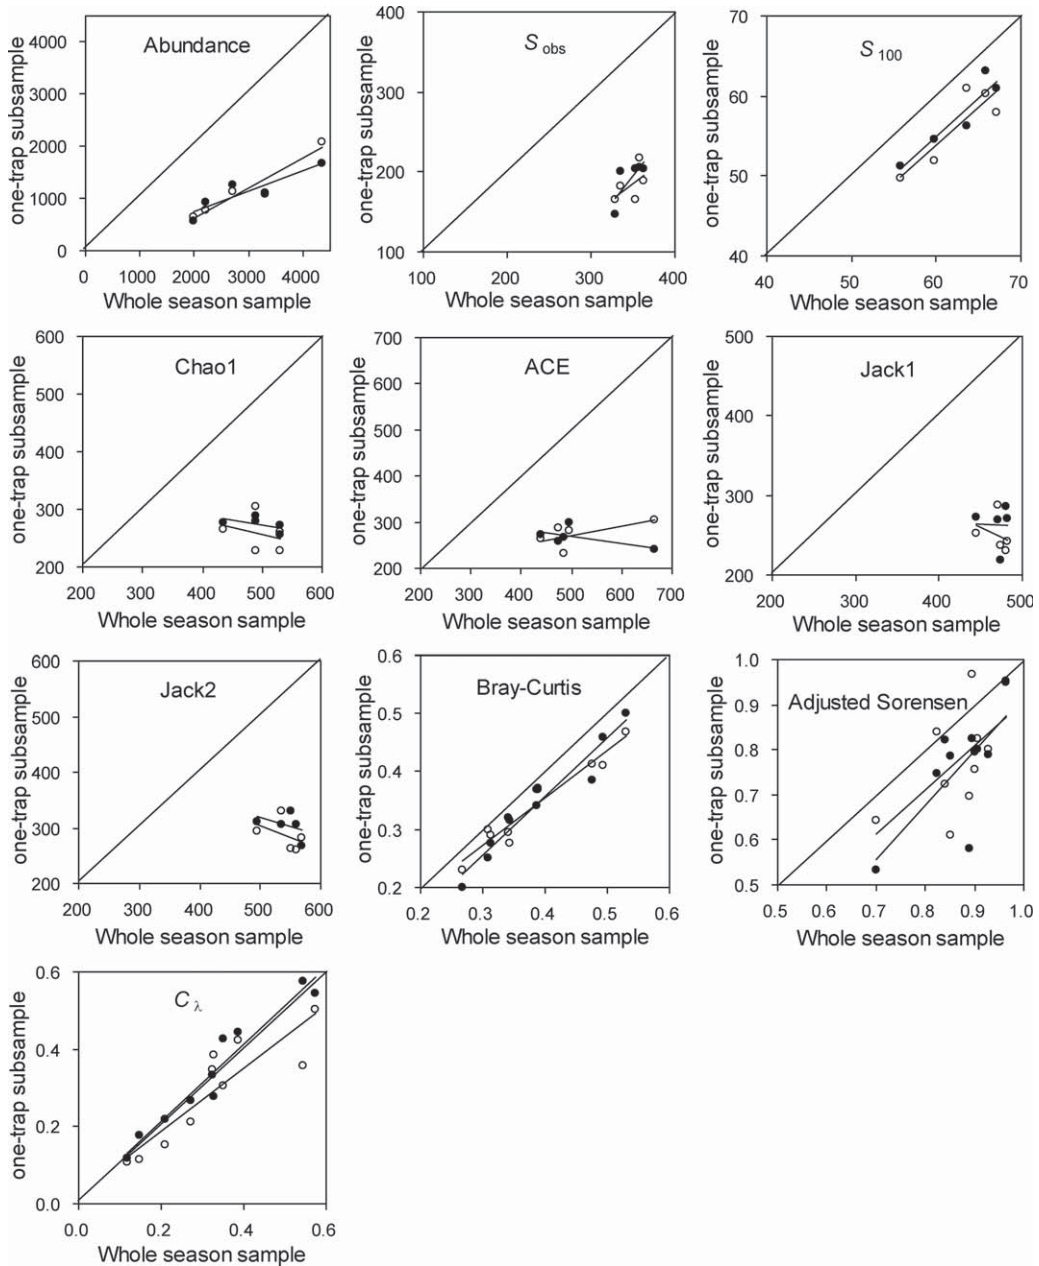

Fig. 2. Relationships between values of each measure in one-trap subsample in July + August and those in the whole season sample. Two light traps in each stand were randomly assigned into two groups, represented here with different symbols.

et al. 1994, Landau et al. 1999). It is therefore critical to obtain the information about the annual activity cycles to determine the optimal sampling period. In July and August, however, >2,000 moths were captured in each stand, and so there is a huge processing cost to sort and identify these individuals. Efficient sampling schemes should reduce both the time invested in collection and the processing cost after collection (Oliver and Beattie 1996, Lawton et al. 1998). In this sense, it is efficient to reduce the

number of traps in each stand from two to one because we can estimate abundance, species richness and similarity in the whole season sample even with one trap per stand. This sampling scheme performed well for most of the moth groups classified based on larval feeding plants and voltinism. These findings suggest that setting one light trap on a night in July and August is the most efficient sampling scheme to produce samples that are representative of the whole-season sampling.

Table 4. Mean (SD) of species richness estimators and similarity indices in each stand obtained from one-trap subsamples

| Sampling period            | June + July    | June + Aug.    | June + Sept.   | July + Aug.    | July + Sept.   | Aug. + Sept.   |
|----------------------------|----------------|----------------|----------------|----------------|----------------|----------------|
| Species richness estimator |                |                |                |                |                |                |
| $S_{obs}$                  | 118.60 (19.91) | 134.10 (15.43) | 68.50 (11.93)  | 187.90 (21.08) | 138.80 (15.91) | 145.10 (15.57) |
| $S_{100}$                  | 49.79 (6.19)   | 51.00 (4.98)   | 44.90 (5.32)   | 56.70 (4.38)   | 50.70 (6.16)   | 50.47 (3.76)   |
| Chao1                      | 175.34 (36.45) | 206.51 (28.35) | 129.10 (35.14) | 265.56 (19.76) | 216.50 (36.08) | 224.46 (40.64) |
| ACE                        | 194.33 (47.56) | 234.37 (45.19) | 168.02 (41.58) | 270.38 (21.91) | 243.33 (52.30) | 244.29 (47.85) |
| Jack1                      | 168.00 (28.05) | 191.59 (18.97) | 105.29 (17.64) | 256.53 (21.92) | 198.39 (19.75) | 205.30 (19.39) |
| Jack2                      | 195.72 (35.73) | 226.53 (20.80) | 130.82 (23.67) | 295.27 (23.11) | 234.61 (25.73) | 241.75 (24.85) |
| Similarity index           |                |                |                |                |                |                |
| Bray–Curtis                | 0.29 (0.09)    | 0.36 (0.09)    | 0.27 (0.08)    | 0.34 (0.08)    | 0.28 (0.08)    | 0.37 (0.16)    |
| Adjusted Sorensen          | 0.70 (0.15)    | 0.80 (0.07)    | 0.70 (0.13)    | 0.77 (0.11)    | 0.70 (0.14)    | 0.80 (0.08)    |
| Morisita's $C_A$           | 0.29 (0.18)    | 0.41 (0.17)    | 0.38 (0.21)    | 0.31 (0.14)    | 0.21 (0.18)    | 0.38 (0.16)    |

Two light traps in each stand were randomly assigned into two groups, and means of the two groups are shown.

**Efficiency of Species Richness Estimators.** Because time and money are always in short supply, we need to accurately predict species richness in an assemblage by using as small a sample as possible (Magurran 2004). Previous studies demonstrate that nonparametric species richness estimators are most promising in estimating species richness in highly diverse communities (Colwell and Coddington 1994, Gotelli and Colwell 2001). In the current study, however, nonparametric estimators can estimate values in the whole season sample only in 2-mo subsamples, suggesting that they do not work well with reduced sample size. In addition, values of any nonparametric estimators did not achieve stable asymptotes across the range of our sampling efforts, indicating that nonparametric estimators do not estimate true species richness even from the whole season sample. Values of nonparametric estimators have not reached stable asymptotes in previous studies on moth assemblages using light traps (Landau et al. 1999, O'Hara 2005, Summerville and Crist 2005). From these results, Summerville and Crist (2005) emphasize that nonparametric estimators should only be used to provide a minimum approximation for predicting species richness. Therefore, nonparametric estimators seem to be useless in estimating species richness of moth assemblages because they neither estimate true species richness in the assemblages nor estimate values in the whole season sampling from reduced sampling schemes.

In contrast, we were able to estimate  $S_{100}$  in the whole season sample from the one-trap subsample in

July + August. This is probably because  $S_{100}$  is more resistant to undersampling than nonparametric estimators, which is indicated by the smaller decrease in  $S_{100}$  than the nonparametric estimators when the number of traps in each stand was reduced from two to one. Furthermore, sample-based rarefaction curves did not intercept each other, suggesting that  $S_{100}$  represents the ranking of true species richness (Lande et al. 2000). Therefore, it is efficient to use rarefied species richness to detect ranking of species richness in moth assemblages. Brehm et al. (2003) also suggests that rarefied species richness is a suitable measure of local diversity in moth assemblages.

**Efficiency of Similarity Indices.** Compared with the species richness estimators, similarity indices used in the current study were highly useful in estimating species turnover from reduced sampling schemes. Values of similarity indices decreased only slightly when the number of traps in each stand was reduced from two to one. This is probably because within-stand diversity is much smaller than between-stand diversity in forest moth community composition (Summerville et al. 2003).

Among the similarity indices, the Bray–Curtis index had the highest  $r^2$  in most of the subsamples. Although the Bray–Curtis index yielded slightly underestimated values in the one-trap subsample in July + August, the

Table 5.  $r^2$  of values of each measure in the one-trap subsamples in July + August on those in the whole season sample for each group classified by larval feeding plants or voltinism

|                            | Larval feeding plant |       | Voltinism  |
|----------------------------|----------------------|-------|------------|
|                            | Woody plant          | Other | Univoltine |
| Abundance                  | 0.34                 | 0.99  | 0.91       |
| Species richness estimator |                      |       |            |
| $S_{100}$                  | 0.65                 | 0.87  | 0.75       |
| Similarity index           |                      |       |            |
| Bray–Curtis                | 0.89                 | 0.93  | 0.93       |
| Morisita's $C_A$           | 0.82                 | 0.85  | 0.86       |

Two light traps in each stand were randomly assigned into two groups, and mean  $r^2$  values of the two groups are shown.

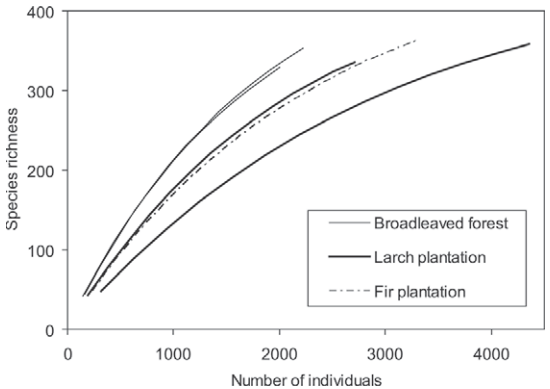

Fig. 3. Sample-based rarefaction curves for the whole season sample in each stand.

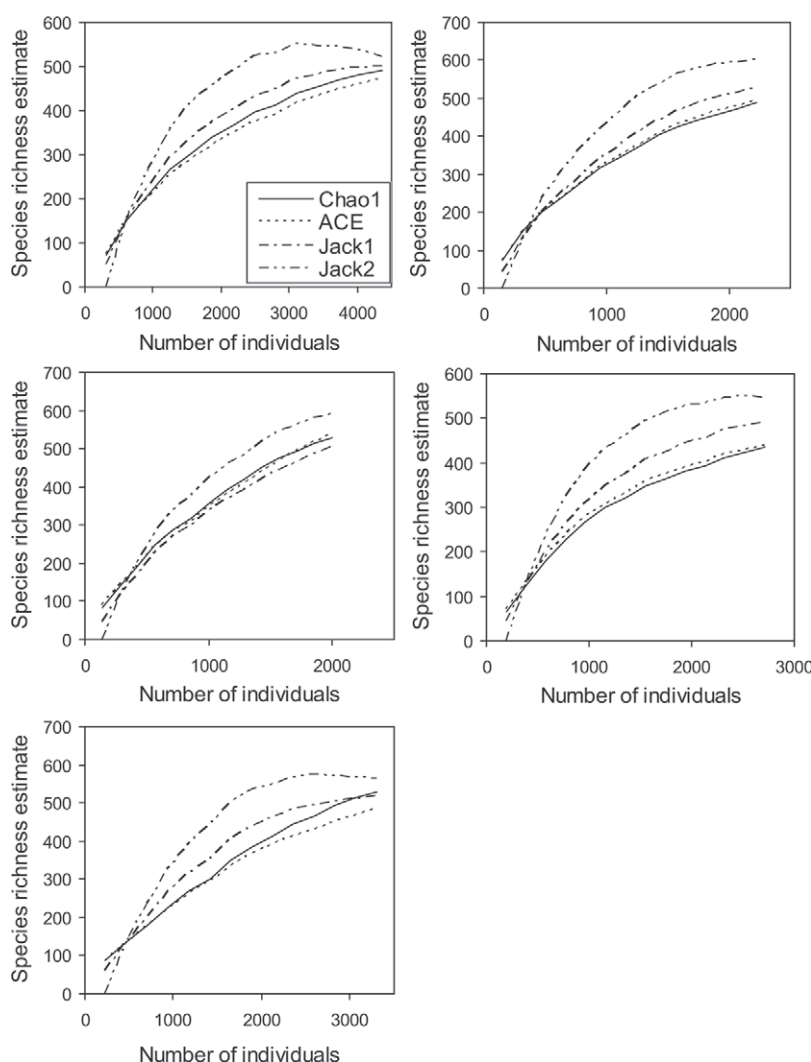

Fig. 4. Performance of four nonparametric species richness estimators in relation to the accumulated number of individuals for the whole season sample in five stands.

high  $r^2$  was sufficient to estimate the relative difference between stands. Because the Bray–Curtis index has been shown to be one of the most effective measures of species similarity (McCune and Grace 2002), it is preferred to use this index in moth assemblages.  $C_\lambda$  also had high  $r^2$  values in most of the subsamples.  $C_\lambda$  produced unbiased estimates in the one-trap subsample in July + August, indicating that this index has smaller undersampling bias than the Bray–Curtis index.  $C_\lambda$  has a major advantage in that it is virtually independent of sample size (Morisita 1959). In this respect,  $C_\lambda$  is more robust than the well-known Morisita–Horn index (Wolda 1981). Therefore,  $C_\lambda$  should be used to estimate similarity in sampling schemes with small sample size although this index is known to be sensitive to abundance of dominant species (Wolda 1981).

In contrast,  $r^2$  of the adjusted Sorensen index, which was developed to reduce undersampling bias, was lower than those of the other two indices. This might

be because the adjusted Sorensen index is sensitive to the difference in sampling period in assemblages with high seasonality. However, values of this index decreased when the number of traps in each stand was reduced from two to one, suggesting that this index is still affected by sample size. Chao et al. (2005) indicates that some bias remains in this index, especially under severe undersampling and for highly dissimilar samples, which might be the case in the samples from moth assemblages.

**Problems in Reduced Sampling Scheme.** Any attempts to reduce sampling periods and processing effort inevitably would result in some loss of information. There is generally a tradeoff between sampling efforts and the number of species collected (Balmford et al. 1996). For example, the short-term sampling scheme recommended in the current study missed up to 40% of the species collected in the whole season sample. These species include those emerging only in



spring or in autumn, especially some geometrid winter moths that occur only in November (Sayama et al. 2011). If any of these species have particular conservation concern, occurrence period of the species with conservation concern should be covered within the sampling period. Thus, the practical approach to yield the optimal sampling scheme depends on compromise between time and resources available and conservation objectives.

### Acknowledgments

We thank Y. Korenaga for making light traps and R. Johns for critically reviewing the manuscript. We also thank Greenery Promotion Department, Environment Bureau of the City of Sapporo, and National Agricultural Research Center for Hokkaido Region for permission to sample moths. This study was supported by Grant-in-Aid for Scientific Research 19380094.

### References Cited

- Balmford, A., M. J. B. Green, and M. G. Murray. 1996. Using higher-taxon richness as a surrogate for species richness: I. Regional tests. *Proc. R. Soc. Lond. B* 263: 1267–1274.
- Brehm, G., D. Sussenbach, and K. Fiedler. 2003. Unique elevational diversity patterns of geometrid moths in an Andean montane rainforest. *Ecography* 26: 456–466.
- Brose, U. 2002. Estimating species richness of pitfall catches by non-parametric estimators. *Pedobiologia* 46: 101–107.
- Brose, U., and N. D. Martinez. 2004. Estimating the richness of species with variable mobility. *Oikos* 105: 292–300.
- Brose, U., N. D. Martinez, and R. J. Williams. 2003. Estimating species richness: sensitivity to sample coverage and insensitivity to spatial patterns. *Ecology* 84: 2364–2377.
- Butler, L., V. Kondo, E. M. Barrows, and E. C. Townsend. 1999. Effects of weather conditions and trap types on sampling for richness and abundance of forest macrolepidoptera. *Environ. Entomol.* 28: 795–811.
- Chao, A., and T. J. Shen. 2003. Program SPADE (Species Prediction And Diversity Estimation). (<http://chao.stat.nthu.edu.tw>).
- Chao, A., R. L. Chazdon, R. K. Colwell, and T. J. Shen. 2005. A new statistical approach for assessing similarity of species composition with incidence and abundance data. *Ecol. Lett.* 8: 148–159.
- Choi, S. 2008. Effects of weather factors on the abundance and diversity of moths in a temperate deciduous mixed forest of Korea. *Zool. Sci.* 25: 53–58.
- Colwell, R. K. 2005. Estimate S: statistical estimation of species richness and shared species from samples. Version 8.0. (<http://purl.oclc.org/estimates>).
- Colwell, R. K., and J. A. Coddington. 1994. Estimating terrestrial biodiversity through extrapolation. *Phil. Trans. R. Soc. Lond. B* 345: 101–118.
- Gotelli, N. J., and R. K. Colwell. 2001. Quantifying biodiversity: procedures and pitfalls in the measurement and comparison of species richness. *Ecol. Lett.* 4: 379–391.
- Hirao, T., M. Murakami, H. Kogi, A. Kashizaki, Y. Hirai, S. Tanabe, N. Inari, H. Yorozyua, and M. J. Toda. 2006. International biodiversity observation year in Western-Pacific and Asian regions (DIWPA-IBOY): a case report on species rarity and spatio-temporal variability of species composition in Lepidoptera and Coleoptera communities from a temperate forest of northern Japan. *Ecol. Res.* 21: 811–818.
- Hurlbert, S. H. 1971. The nonconcept of species diversity: a critique and alternative parameters. *Ecology* 52: 577–586.
- Inoue, H., S. Sugi, H. Kuroko, S. Moriuti, A. Kawabe, and M. Owada. 1982. *Moths of Japan*, vol. 1. Kodansha, Tokyo, Japan.
- Intachat, J., and I. P. Woiwod. 1999. Trap design for monitoring moth biodiversity in tropical rainforests. *Bull. Entomol. Res.* 89: 153–163.
- Jones, D. T., and P. Eggleton. 2000. Sampling termite assemblages in tropical forests: testing a rapid biodiversity assessment protocol. *J. Appl. Ecol.* 37: 191–203.
- Kitching, R. L., A. G. Orr, L. Thalib, H. Mitchell, M. S. Hopkins, and A. W. Graham. 2000. Moth assemblages as indicators of environmental quality in remnants of upland Australian rain forest. *J. Appl. Ecol.* 37: 284–297.
- Landau, D., D. Prowell, and C. E. Carlton. 1999. Intensive versus long-term sampling to assess Lepidopteran diversity in a southern mixed mesophytic forest. *Ann. Entomol. Soc. Am.* 92: 435–441.
- Lande, R., P. J. DeVries, and T. R. Walla. 2000. When species accumulation curves intersect: implications for ranking diversity using small samples. *Oikos* 89: 601–605.
- Lawton, J. H., D. E. Bignell, B. Bolton, G. F. Bloemers, P. Eggleton, P. M. Hammond, M. Hodda, R. D. Holt, T. B. Larsen, N. A. Mawdsley, et al. 1998. Biodiversity inventories, indicator taxa and effects of habitat modification in tropical forest. *Nature* 391: 72–76.
- Magurran, A. E. 2004. *Measuring biological diversity*. Blackwell, Oxford, United Kingdom.
- McCune, B., and J. B. Grace. 2002. *Analysis of Ecological Communities*. MjM Software, Gleneden Beach, OR.
- Miyata, A. 1983. *Handbook of the moth ecology: moths as an indicator of the environment*. Showado Printing Publishing Division, Isahaya, Japan.
- Mizutani, M. 1984. The influences of weather and moonlight on the light trap catches of moths. *Appl. Entomol. Zool.* 19: 133–141.
- Morisita, M. 1959. Measuring of interspecific association and similarity between communities. *Mem. Fac. Sci. Kyushu Univ. Ser. E (Biol.)* 3: 65–80.
- O'Hara, R. B. 2005. Species richness estimators: how many species can dance on the head of a pin? *J. Anim. Ecol.* 74: 375–386.
- Odegaard, F. 2000. How many species of arthropods? Erwin's estimate revised. *Biol. J. Linn. Soc.* 71: 583–597.
- Okochi, I. 2002. A new portable light trap for moth collection. *Bull. FFPRI* 1: 231–234.
- Oliver, I., and A. J. Beattie. 1996. Designing a cost-effective invertebrate survey: a test of methods for rapid assessment of biodiversity. *Ecol. Appl.* 6: 594–607.
- Ozaki, K., M. Isono, T. Kawahara, S. Iida, T. Kudo, and K. Fukuyama. 2006. A mechanistic approach to evaluation of umbrella species as conservation surrogates. *Conserv. Biol.* 20: 1507–1515.
- Raimondo, S., J. S. Strazanac, and L. Butler. 2004. Comparison of sampling techniques used in studying Lepidoptera population dynamics. *Environ. Entomol.* 33: 418–425.
- Sayama, K., M. Ito, K. Tabuchi, A. Ueda, K. Ozaki, and T. Hironaga. 2011. Seasonal trends of forest moth assemblages in central Hokkaido, northern Japan. *J. Lepid. Soc.* (in press).
- Scalercio, S., M. Infusino, and I. P. Woiwod. 2009. Optimising the sampling window for moth indicator communities. *J. Insect Conserv.* 13: 583–591.

- Schowalter, T. D., W. W. Hargrove, and D. A. Crossley. 1986. Herbivory in forested ecosystems. *Annu. Rev. Entomol.* 31: 177–196.
- Southwood, T. R. E., and P. A. Henderson. 2000. *Ecological methods*, 3rd ed. Blackwell, Oxford, United Kingdom.
- Sparrow, H. R., T. D. Sisk, P. R. Ehrlich, and D. D. Murphy. 1994. Techniques and guidelines for monitoring Neotropical butterflies. *Conserv. Biol.* 8: 800–809.
- Sugi, S., M. Yamamoto, K. Nakatomi, R. Sato, H. Nakajima, and M. Owada. 1987. *Larvae of larger moths in Japan*. Kodansha, Tokyo, Japan.
- Summerville, K. S., and T. O. Crist. 2003. Determinants of lepidopteran community composition and species diversity in eastern deciduous forests; roles of season, eco-region and patch size. *Oikos* 100: 134–148.
- Summerville, K. S., and T. O. Crist. 2005. Temporal patterns of species accumulation in a survey of Lepidoptera in a beech-maple forest. *Biodivers. Conserv.* 14: 3393–3406.
- Summerville, K. S., and T. O. Crist. 2008. Structure and conservation of lepidopteran communities in managed forests of northeastern North America: a review. *Can. Entomol.* 140: 475–494.
- Summerville, K. S., M. J. Boulware, J. A. Veech, and T. O. Crist. 2003. Spatial variation in species diversity and composition of forest Lepidoptera in eastern deciduous forests of North America. *Conserv. Biol.* 17: 1045–1057.
- Thomas, A. W., and G. M. Thomas. 1994. Sampling strategies for estimating moth species diversity using a light trap in a northeastern softwood forest. *J. Lepid. Soc.* 48: 85–105.
- Wolda, H. 1981. Similarity indices, sample size and diversity. *Oecologia* 50: 296–302.
- Yela, J. L., and M. Holyoak. 1997. Effects of moonlight and meteorological factors on light and bait trap catches of noctuid moths (Lepidoptera: Noctuidae). *Environ. Entomol.* 26: 1283–1290.

*Received 8 February 2011; accepted 27 April 2011.*
